# Supplementary material for: Noninvasive Assessment of Neuromuscular Disease in Dogs: Use of the 6‐minute Walk Test to Assess Submaximal Exercise Tolerance in Dogs with Centronuclear Myopathy
Source: PubMed Central journal article supplement — J Vet Intern Med. 2016 Mar 25;30(3):808–12. doi: 10.1111/jvim.13939 (PMC4913584; doi:10.1111/jvim.13939), 2016-03-25
Supplement: JVIM-30-808-s001.pdf [file JVIM-30-808-s001.pdf]

**Table 1:** Cohort characteristics, including dogs' signalment, coat color, and genotype.

| <b>Dog number</b> | <b>Sex</b> | <b>Coat color</b> | <b>Genotype</b> | <b>Number of evaluations</b> | <b>Age at evaluation (range; weeks of age)</b> |
|-------------------|------------|-------------------|-----------------|------------------------------|------------------------------------------------|
| 1                 | F          | Black             | WT              | 2                            | 9 – 11*                                        |
| 2                 | M          | Yellow            | A               | 6                            | 9 – 33                                         |
| 3                 | M          | Black             | C               | 7                            | 9 – 41                                         |
| 4                 | F          | Black             | WT              | 7                            | 9 – 41                                         |
| 5                 | M          | Black             | WT              | 7                            | 9 – 41                                         |
| 6                 | M          | Black             | C               | 8                            | 9 – 49                                         |
| 7                 | M          | Black             | A               | 1                            | 49                                             |
| 8                 | M          | Black             | A               | 1                            | 303                                            |

F, female; M, male; WT, homozygous wild type genotype; C, carrier/heterozygous PTPLA-mutant genotype; A, affected/homozygous PTPLA mutant genotype.

\*Dog 1 was euthanized at 12 weeks of age due to unrelated metabolic disease (congenital liver disease).

**Table 2:** Six-minute walk test findings, listed as mean and standard deviation (SD).

Distance walked is reported in meters. Affected dogs are highlighted by bolded text.

| <b>Dog number</b>             | <b>Distance walked (mean, SD)</b> | <b>Number of steps (mean, SD)</b> |
|-------------------------------|-----------------------------------|-----------------------------------|
| 1                             | 406.9, 76.8                       | 107, 38                           |
| 2                             | 293.5, 106.1                      | 717, 257                          |
| 3                             | 601.0, 150.3                      | 961, 166                          |
| 4                             | 593.4, 153.9                      | 1013, 55                          |
| 5                             | 492.2, 92.0                       | 1013, 37                          |
| 6                             | 491.1, 85.3                       | 977, 75                           |
| 7                             | 256.2, 0                          | 1052, 0                           |
| 8                             | 9.15, 0                           | -                                 |
| <b>Number of evaluations:</b> | <b>39</b>                         | <b>38</b>                         |
